# Supplementary material for: Circulating Microbiota-Based Metagenomic Signature for Detection of Hepatocellular Carcinoma
Source: PubMed Central journal article supplement (PMC6525191; doi:10.1038/s41598-019-44012-w), 2019-05-17

## Supporting information

### **Circulating Microbiota-Based Metagenomic Signature for Detection of Hepatocellular Carcinoma**

Eun Ju Cho<sup>1\*</sup>, Sangseob Leem<sup>2\*</sup>, Sunah Kim<sup>2</sup>, Jinho Yang<sup>3</sup>, Yun bin Lee<sup>1</sup>, Soon Sun Kim<sup>4</sup>, Jae Youn Cheong<sup>4</sup>, Sung Won Cho<sup>4</sup>, Ji Won Kim<sup>5</sup>, Sung-Min Kim<sup>6</sup>, Jung-Hwan Yoon<sup>1\*\*</sup>, and Taesung Park<sup>2\*\*</sup>

*<sup>1</sup>Department of Internal Medicine and Liver Research Institute, Seoul National University College of Medicine, Seoul, Korea*

*<sup>2</sup>Department of Statistics, Seoul National University, Seoul, Korea*

*<sup>3</sup>Department of Health and Safety Convergence Science, Korea University, Seoul, Korea*

*<sup>4</sup>Department of Gastroenterology, Ajou University School of Medicine, Suwon, Korea*

*<sup>5</sup>Department of Internal Medicine, Seoul National University Boramae Hospital, Seoul National University College of Medicine, Seoul, Korea*

*<sup>6</sup>Department of Internal Medicine, Inje University Haeundae Paik Hospital*

\*These authors equally contributed to this work.

\*\*These co-corresponding authors equally contributed to this work.

**Supplementary Table 1. Taxonomic composition used in the diagnostic models of table 2**

| OTU symbol | Genus           | Control        | Cirrhosis     | HCC           | <i>p</i> value |
|------------|-----------------|----------------|---------------|---------------|----------------|
| g778       | Pseudomonas     | 10.12% (7.22%) | 9.59% (6.17%) | 7.03% (4.14%) | 0.0097         |
| g362       | Streptococcus   | 5.80% (5.40%)  | 1.37% (1.73%) | 1.93% (3.76%) | 1.7e-06        |
| g319       | Staphylococcus  | 1.99% (2.46%)  | 5.04% (7.18%) | 8.64% (8.98%) | 4.0e-08        |
| g769       | Acinetobacter   | 2.17% (2.83%)  | 3.93% (4.38%) | 6.90% (8.10%) | 5.7e-06        |
| g147       | Bifidobacterium | 4.03% (3.68%)  | 2.52% (2.78%) | 2.07% (2.68%) | 0.0016         |
| g725       | Klebsiella      | 2.02% (2.97%)  | 2.11% (4.23%) | 4.83% (5.91%) | 0.0020         |
| g348       | Enterococcus    | 2.21% (2.49%)  | 2.10% (2.40%) | 1.51% (2.31%) | 0.5927         |
| g837       | Akkermansia     | 1.85% (2.33%)  | 1.11% (1.65%) | 1.03% (1.89%) | 0.2725         |
| g732       | Trabulsiella    | 0.56% (0.95%)  | 1.43% (2.18%) | 3.85% (4.46%) | 2.0e-07        |
| g179       | Prevotella      | 1.13% (1.44%)  | 0.65% (1.34%) | 0.69% (1.57%) | 0.6813         |

Median and SDs of relative abundances of 10 genus used in the diagnostic models. \*Significant *p* value (HCC vs healthy control with adjustment of age and sex covariates) after multiple test correction. All *p*-values of OTUs before multiple test corrections are lower than 0.05.

**Supplementary Figure 1.** (a)  $\alpha$ -diversity (Shannon index) of taxa according to liver function at the phylum and genus levels.  $p$  values from the Kruskal–Wallis tests are shown. (b) The PCoA plot based on the unweighted and weighted UniFrac distances. The control samples are colored as green, compensated group as gray, and decompensated group as red.

(a)

Phylum level

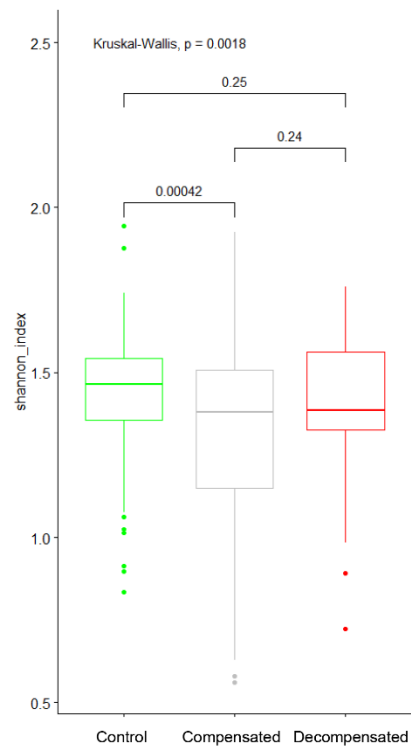

Genus level

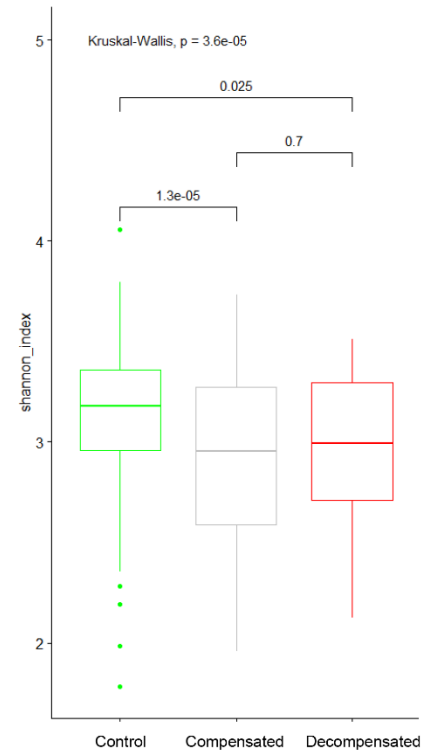

(b)

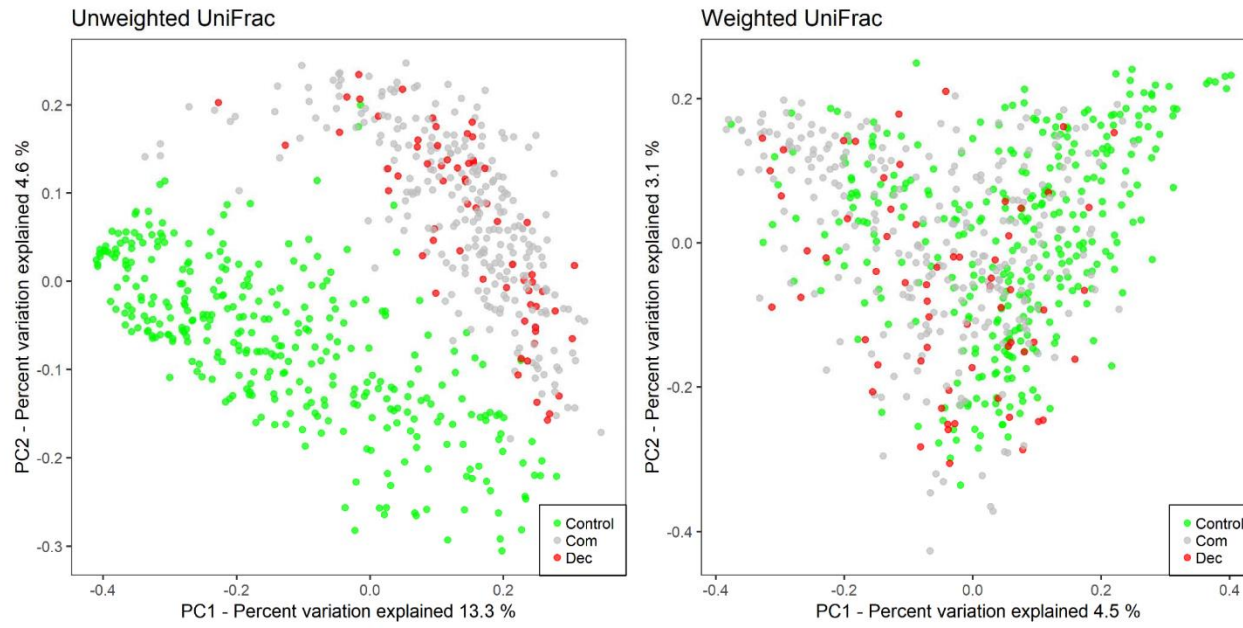

**Supplementary Figure 2.** (a)  $\alpha$ -diversity (Shannon index) of taxa according to etiology of liver disease at the phylum and genus levels.  $p$  values from the Kruskal–Wallis tests are shown. (b) The PCoA plot based on the unweighted and weighted UniFrac distances. The control samples are colored as green, non-viral group as gray, and hepatitis virus-related group as red.

(a)

Phylum level

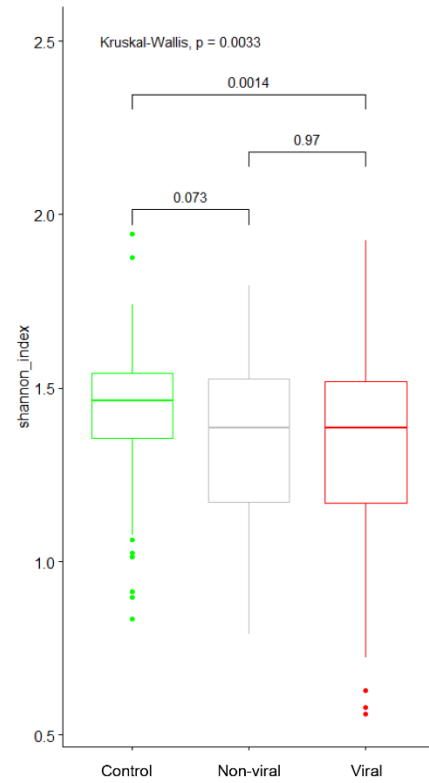

Genus level

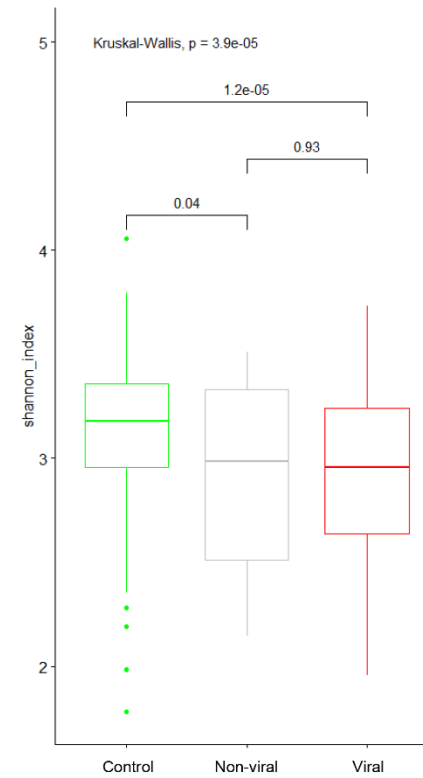

(b)

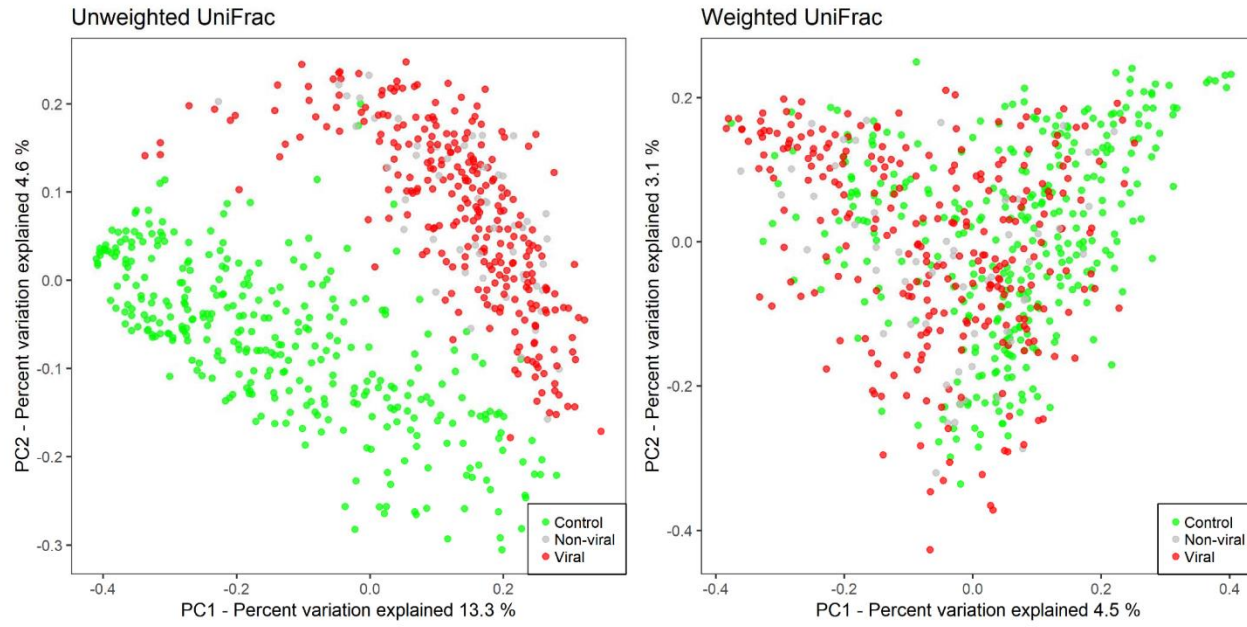

**Supplementary Figure 3.** The predicted probability of HCC in the three groups in the (a) model development set and (b) test set.  $p$  values from the Kruskal–Wallis tests or the Wilcoxon rank-sum test are shown. Com, compensated liver function, Dec, decompensated liver function, HCC, hepatocellular carcinoma

(a)

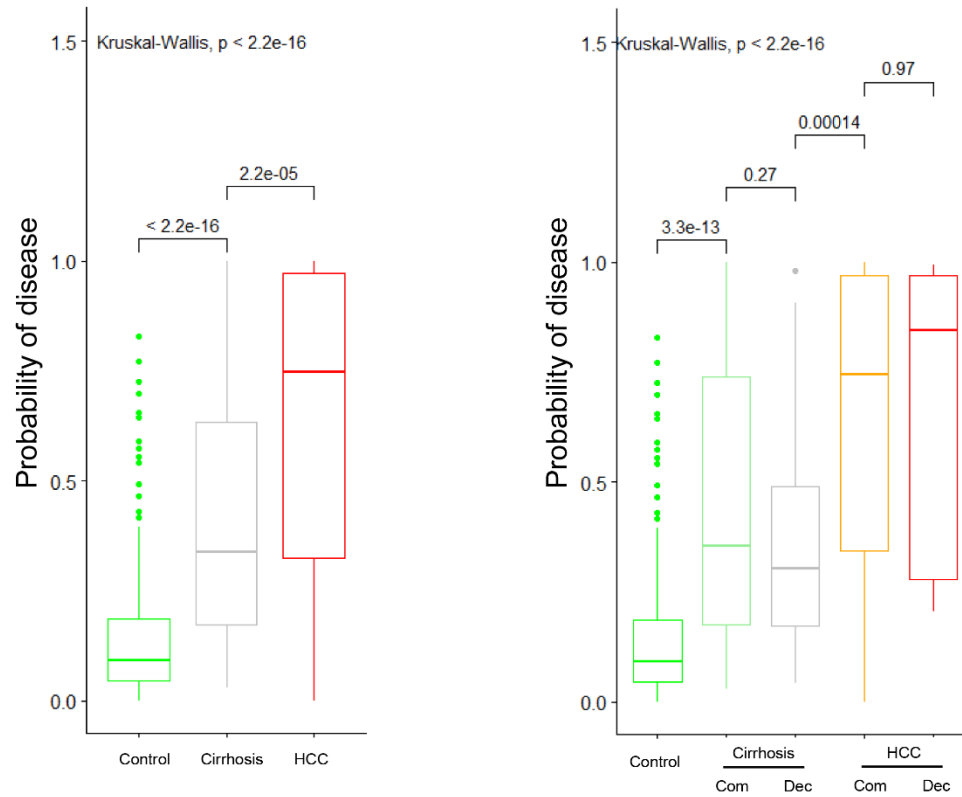

(b)

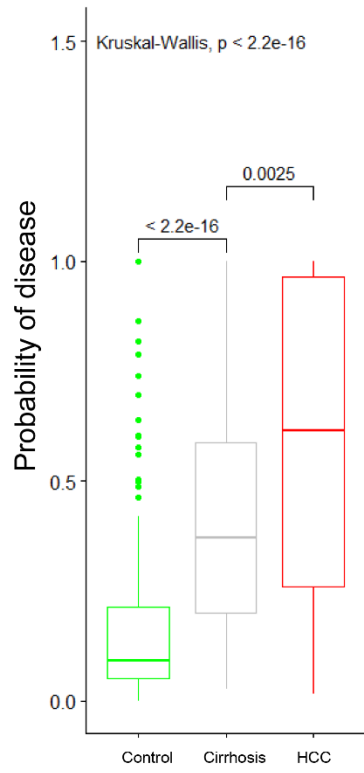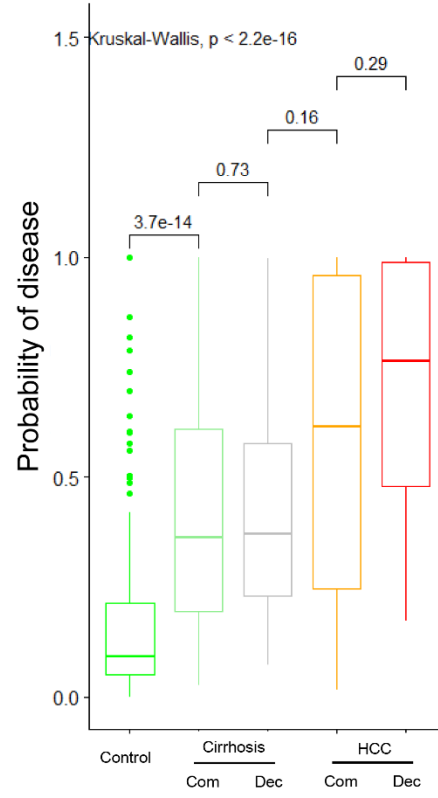

Supplement: 41598_2019_44012_MOESM1_ESM.pdf [file 41598_2019_44012_MOESM1_ESM.pdf]
